# Supplementary material for: Expanded Newborn Screening in Italy Using Tandem Mass Spectrometry: Two Years of National Experience
Source: MDPI journal article supplement (doi:10.3390/ijns8030047), 2022-08-09
Supplement: s1 [file s1]

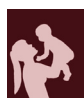

**Table S1.** Cut off calculated on term infants aged 48-72 hours for biomarkers analyzed by a non derivatized method.

| Carnitines                                                      | Number of laboratories | Minimum | Maximum | Median | Mean  | SD   | CV%   |
|-----------------------------------------------------------------|------------------------|---------|---------|--------|-------|------|-------|
| C0 (Low) - free                                                 | 13                     | 4.6     | 8.0     | 7.0    | 6.61  | 1.2  | 18.9% |
| C0 (High) - free                                                | 13                     | 44.4    | 80.0    | 50.0   | 53.58 | 9.9  | 18.5% |
| C2 (Low) - acetyl                                               | 13                     | 2.0     | 10.2    | 7.0    | 6.66  | 2.7  | 40.0% |
| C2 (High) - acetyl                                              | 13                     | 38.0    | 88.0    | 50.0   | 54.4  | 12.5 | 22.9% |
| C3 - propionyl                                                  | 13                     | 3.00    | 6.00    | 4.70   | 4.26  | 1.00 | 23.5% |
| C4 - butyryl                                                    | 13                     | 0.55    | 1.00    | 0.92   | 0.86  | 0.15 | 18.0% |
| C3DC+C4OH - sum of malonyl and 3-OH-butyryl                     | 13                     | 0.34    | 0.59    | 0.50   | 0.47  | 0.08 | 16.2% |
| C5 - isovaleryl                                                 | 13                     | 0.22    | 0.85    | 0.40   | 0.44  | 0.19 | 44.2% |
| C4DC+C5OH - sum of methylmalonyl and 3-OH-isovaleryl            | 13                     | 0.40    | 0.87    | 0.56   | 0.57  | 0.15 | 26.2% |
| C5DC - glutaryl                                                 | 12                     | 0.08    | 0.40    | 0.23   | 0.24  | 0.09 | 38.1% |
| C5:1 - tiglyl                                                   | 13                     | 0.02    | 0.11    | 0.05   | 0.05  | 0.02 | 48.8% |
| C6 - hexanoyl                                                   | 13                     | 0.08    | 0.60    | 0.17   | 0.19  | 0.13 | 68.9% |
| C8 - octanoyl                                                   | 13                     | 0.11    | 0.55    | 0.25   | 0.25  | 0.12 | 49.9% |
| C10 - decanoyl                                                  | 13                     | 0.17    | 0.53    | 0.25   | 0.29  | 0.10 | 33.7% |
| C12 - dodecanoyl                                                | 13                     | 0.23    | 0.60    | 0.32   | 0.35  | 0.10 | 28.8% |
| C14 - tetradecanoyl                                             | 13                     | 0.37    | 0.80    | 0.50   | 0.51  | 0.10 | 20.2% |
| C14:1 - tetradecenoyl                                           | 13                     | 0.27    | 0.70    | 0.39   | 0.40  | 0.12 | 29.8% |
| C16 (High) - palmitoyl                                          | 13                     | 5.60    | 9.00    | 7.23   | 7.35  | 0.90 | 12.2% |
| C16 (Low) - palmitoyl                                           | 13                     | 0.48    | 1.68    | 1.00   | 1.13  | 0.43 | 38.2% |
| C16:1 - hexadecenoyl                                            | 13                     | 0.41    | 0.80    | 0.52   | 0.54  | 0.11 | 20.7% |
| C16OH - 3-hydroxypalmitoyl                                      | 13                     | 0.05    | 0.10    | 0.07   | 0.08  | 0.02 | 25.2% |
| C16:1OH - 3-hydroxypalmitoleyl                                  | 13                     | 0.06    | 0.19    | 0.09   | 0.10  | 0.03 | 32.9% |
| C18 (High) - octadecanoyl                                       | 13                     | 1.69    | 2.90    | 2.07   | 2.15  | 0.40 | 18.5% |
| C18 (Low) - octadecanoyl                                        | 13                     | 0.09    | 0.51    | 0.35   | 0.36  | 0.12 | 33.9% |
| C18:1 (High) - octadecenoyl                                     | 13                     | 2.43    | 4.00    | 2.90   | 2.98  | 0.45 | 15.1% |
| C18:1 (Low) - octadecenoyl                                      | 13                     | 0.00    | 0.67    | 0.40   | 0.36  | 0.27 | 73.6% |
| C18OH - 3-hydroxyoctadecanoyl                                   | 13                     | 0.03    | 0.08    | 0.04   | 0.05  | 0.02 | 33.5% |
| C18:1OH - 3-hydroxyoctadecenoyl                                 | 13                     | 0.04    | 0.70    | 0.07   | 0.15  | 0.20 | 134%  |
| ratio: C0/(C16+C18)                                             | 12                     | 8.40    | 31.0    | 14.0   | 15.8  | 7.32 | 46.2% |
| ratio: (C16+C18:1)/C2                                           | 11                     | 0.32    | 1.00    | 0.44   | 0.53  | 0.24 | 45.1% |
| Aminoacids                                                      | Numer of laboratories  | Minimum | Maximum | Median | Mean  | SD   | CV%   |
| Phe - phenylalanine                                             | 13                     | 67.0    | 120     | 100    | 99.4  | 17.0 | 17.1% |
| Tyr - tyrosine                                                  | 13                     | 165     | 300     | 250    | 240   | 34.2 | 14.2% |
| Val - valine                                                    | 13                     | 160     | 300     | 243    | 236   | 41.4 | 17.6% |
| Xle - sum of isoleucine, leucine, alloisoleucine and OH-proline | 13                     | 181     | 300     | 245    | 242   | 41.9 | 17.3% |
| Met (high) - methionine                                         | 13                     | 24.3    | 45.0    | 37.0   | 36.9  | 6.34 | 17.2% |
| Met (low) - methionine                                          | 13                     | 4.2     | 9.14    | 7.0    | 7.3   | 1.80 | 25.2% |
| Cit (high) - citrulline                                         | 13                     | 23.8    | 90.0    | 35.0   | 39.6  | 16.4 | 41.3% |
| Cit (low) - citrulline                                          | 13                     | 3.0     | 7.0     | 4.7    | 5.1   | 1.4  | 28.1% |
| Arg - arginine                                                  | 13                     | 21.0    | 80.0    | 35.0   | 41.2  | 14.9 | 36.1% |
| Orn - ornithine                                                 | 13                     | 150     | 332     | 235    | 236   | 58.6 | 24.9% |
| Others                                                          | Numer of laboratories  | Minimum | Maximum | Median | Mean  | SD   | CV%   |
| Suac - succinylacetone                                          | 12                     | 0.41    | 2.00    | 1.35   | 1.33  | 0.54 | 40.5% |
| ArgSucc - argininosuccinate                                     | 11                     | 0.50    | 1.20    | 1.00   | 0.85  | 0.25 | 29.3% |

**Table S2.** Cut off calculated on term infants aged 48-72 hours for biomarkers analyzed by a derivatized method.

| Carnitines                                                      | Number of laboratories | Mean |
|-----------------------------------------------------------------|------------------------|------|
| C0 (Low) - free                                                 | 2                      | 11.4 |
| C0 (High) - free                                                | 2                      | 63.5 |
| C2 (Low) - acetyl                                               | 2                      | 5.5  |
| C2 (High) - acetyl                                              | 2                      | 58.0 |
| C3 -propionyl                                                   | 2                      | 3.78 |
| C3DC - malonyl                                                  | 2                      | 0.19 |
| C4 - butyryl                                                    | 2                      | 0.88 |
| C4DC - methylmalonyl                                            | 2                      | 1.09 |
| C4OH - 3-OH-butyryl                                             | 2                      | 0.48 |
| C5 - isovaleryl                                                 | 2                      | 0.37 |
| C5DC - glutaryl                                                 | 2                      | 0.18 |
| C5OH -3-OH-isovaleryl                                           | 2                      | 0.43 |
| C5:1 - tiglyl                                                   | 2                      | 0.08 |
| C6 - hexanoyl                                                   | 2                      | 0.15 |
| C8 - octanoyl                                                   | 2                      | 0.21 |
| C10 - decanoyl                                                  | 2                      | 0.29 |
| C12 - dodecanoyl                                                | 2                      | 0.47 |
| C14 - tetradecanoyl                                             | 2                      | 0.53 |
| C14:1 - tetradecenoyl                                           | 2                      | 0.37 |
| C16 (High) - palmitoyl                                          | 2                      | 6.97 |
| C16 (Low) - palmitoyl                                           | 2                      | 1.13 |
| C16:1 - hexadecenoyl                                            | 2                      | 0.50 |
| C16OH - 3-hydroxypalmitoyl                                      | 2                      | 0.09 |
| C16:1OH - 3-hydroxypalmitoleyl                                  | 2                      | 0.14 |
| C18 (High) - octadecanoyl                                       | 2                      | 1.86 |
| C18 (Low) -octadecanoyl                                         | 2                      | 0.4  |
| C18:1 (High) - octadecenoyl                                     | 2                      | 2.82 |
| C18:1 (Low) - octadecenoyl                                      | 2                      | 0.20 |
| C18OH - 3-hydroxyoctadecanoyl                                   | 2                      | 0.06 |
| C18:1OH - 3-hydroxyoctadecenoyl                                 | 2                      | 0.07 |
| ratio: C0/(C16+C18)                                             | 2                      | 20.4 |
| ratio: (C16+C18:1)/C2                                           | 2                      | 0.33 |
| Aminoacids                                                      | Number of laboratories | Mean |
| Phe - phenylalanine                                             | 2                      | 80.0 |
| Tyr - tyrosine                                                  | 2                      | 216  |
| Val - valine                                                    | 2                      | 194  |
| Xle - sum of isoleucine, leucine, alloisoleucine and OH-proline | 2                      | 197  |
| Met (high) - methionine                                         | 2                      | 32.0 |
| Met (low) - methionine                                          | 2                      | 8.60 |
| Cit (high) - citrulline                                         | 2                      | 29.0 |
| Cit (low) - citrulline                                          | 2                      | 5.60 |
| Arg - arginine                                                  | 2                      | 26.7 |
| Orn - ornithine                                                 | 2                      | 191  |
| Others                                                          | Number of laboratories | Mean |
| Suac - succinylacetone                                          | 2                      | 1.62 |
| ArgSucc - argininosuccinate                                     | 2                      | 1.14 |
